# Supplementary material for: The Vulcan Version 3.0 High-Resolution Fossil Fuel CO&lt;sub&gt;2&lt;/sub&gt;Emissions for the United States
Source: Copernicus journal article supplement (doi:10.5194/essd-2019-154), 2019-11-28
Supplement: Supplementary file 1 [file essd-2019-154-supplement.pdf]

Supplementary Information for

# The Vulcan Version 3.0 High-Resolution Fossil Fuel CO<sub>2</sub> Emissions for the United States

Kevin R. Gurney<sup>1</sup>, Jianming Liang<sup>2</sup>, Risa Patarasuk<sup>2</sup>, Yang Song<sup>2</sup>, Jianhua Huang<sup>2</sup>, Geoffrey Roest<sup>1</sup>

<sup>1</sup>School of Informatics, Computing, and Cyber Systems, Northern Arizona University, Flagstaff, AZ, USA

<sup>2</sup>School of Life Sciences, Arizona State University, Tempe AZ USA

**Table S1: Adjustment factors made to state-scale nonpoint fuel-specific FFCO<sub>2</sub> emissions via comparison to the EIA SEDS consumption data.**

| State | Res NG ratio (EIA/Vulcan) | Res Petrol ratio (EIA/Vulcan) | Com NG ratio (EIA/Vulcan) | Com Petrol ratio (EIA/Vulcan) |
|-------|---------------------------|-------------------------------|---------------------------|-------------------------------|
| AK    | 1.00                      | 0.85                          | SM <sup>P</sup>           | 153.1                         |
| AL    | 1.00                      | 0.75                          | 1.10                      | 4.85                          |
| AR    | 1.00                      | 0.80                          | SM                        | 474.6                         |
| AZ    | 1.03                      | 1.02                          | CM <sup>F</sup>           | SM                            |
| CA    | 1.10                      | 1.19                          | 1.40                      | 4.16                          |
| CO    | 1.01                      | 1.03                          | SM                        | 1.00                          |
| CT    | 1.01                      | 0.77                          | 1.22                      | 0.90                          |
| DC    | 0.87                      | 0.16                          | 1.05                      | 2.54                          |
| DE    | 1.00                      | 1.00                          | 1.09                      | 1.77                          |
| FL    | 1.06                      | 0.81                          | 1.17                      | 9.11                          |
| GA    | 0.94                      | 0.93                          | 1.12                      | 4.09                          |
| HI    | 0.46                      | 0.64                          | 0.82                      | 1.50                          |
| IA    | 0.96                      | 0.48                          | 1.09                      | 8.04                          |
| ID    | 1.10                      | 1.07                          | 1.04                      | 2.11                          |
| IL    | 0.96                      | 0.49                          | 0.95                      | 0.66                          |
| IN    | 0.93                      | 0.90                          | 0.89                      | 0.48                          |
| KS    | 0.87                      | 1.07                          | 1.00                      | 14.2                          |
| KY    | 0.98                      | 0.94                          | CM                        | CM                            |
| LA    | 1.07                      | 0.86                          | 1.51                      | 324.9                         |
| MA    | 1.03                      | 0.90                          | 1.30                      | 0.61                          |
| MD    | 1.00                      | 0.84                          | 0.92                      | 0.59                          |
| ME    | 1.01                      | 0.87                          | SM                        | 1.29                          |
| MI    | 0.99                      | 0.99                          | 1.01                      | 2.77                          |
| MN    | 0.92                      | 0.97                          | 1.08                      | 0.34                          |
| MO    | 0.93                      | 0.94                          | 1.08                      | 2.38                          |
| MS    | 1.02                      | 0.90                          | 1.14                      | 8.26                          |
| MT    | 0.98                      | 0.93                          | 0.92                      | 1.25                          |
| NC    | 1.03                      | 0.71                          | 1.03                      | 0.94                          |
| ND    | 0.99                      | 0.96                          | 1.07                      | 1.34                          |
| NE    | 0.97                      | 0.99                          | 0.98                      | SM                            |
| NH    | 1.03                      | 0.78                          | 1.22                      | 1.55                          |
| NJ    | 0.97                      | 0.58                          | 1.11                      | 1.11                          |
| NM    | 1.05                      | 0.87                          | NM                        | 1443.6                        |
| NV    | 1.12                      | 0.40                          | CM                        | 0.71                          |
| NY    | 0.99                      | 0.96                          | 5.15                      | 0.52                          |
| OH    | 0.98                      | 0.86                          | 1.13                      | 0.62                          |
| OK    | 0.94                      | 0.93                          | 1.08                      | 156.7                         |
| OR    | 1.03                      | 0.77                          | 1.16                      | 0.21                          |
| PA    | 0.97                      | 0.94                          | 1.05                      | 1.00                          |
| RI    | 0.93                      | 0.81                          | SM                        | 0.072                         |
| SC    | 0.98                      | 0.89                          | 0.91                      | 5.78                          |
| SD    | 0.93                      | 0.86                          | SM                        | SM                            |

|                 |             |             |             |             |
|-----------------|-------------|-------------|-------------|-------------|
| TN              | 0.93        | 0.53        | 0.54        | 2.13        |
| TX              | 0.92        | 0.52        | 1.18        | 116.3       |
| UT              | 1.08        | 0.89        | 1.17        | 0.14        |
| VA              | 0.97        | 0.95        | 1.01        | 1.10        |
| VT              | 1.02        | 0.93        | 1.02        | 0.50        |
| WA              | 1.13        | 0.64        | SM          | SM          |
| WI              | 0.96        | 0.94        | 1.00        | 0.07        |
| WV              | 0.97        | 0.46        | 3.35        | 73.7        |
| WY              | 1.05        | 0.97        | 1.08        | SM          |
| <b>US total</b> | <b>0.99</b> | <b>0.83</b> | <b>1.46</b> | <b>0.97</b> |

<sup>p</sup> No Vulcan nonpoint FFCO<sub>2</sub> emissions reported for this state. The EIA SEDS reported state total FFCO<sub>2</sub> was first debited by the Vulcan state point FFCO<sub>2</sub> and the remainder distributed to state counties according to the residential sector Vulcan nonpoint spatial distribution. In the case of the petroleum fuel category, the adjustments are made to distillate fuel only.

<sup>§</sup> In these cases, Vulcan nonpoint reported FFCO<sub>2</sub> emissions but for only a subset of legitimate counties (e.g. in Arizona, only Maricopa county reported nonpoint commercial NG FFCO<sub>2</sub> emissions). The EIA SEDS reported state total difference to the sum of the Vulcan point and nonpoint was distributed only to the unreported counties according to the residential Vulcan nonpoint spatial distribution.

**Table S2: Building classification crosswalk table between the FEMA and DOE/EIA building types.**

| <b>FEMA building code</b> | <b>FEMA building type</b>                                              | <b>DOE/EIA aggregate type</b> | <b>DOE/EIA building sub-type code</b>   |
|---------------------------|------------------------------------------------------------------------|-------------------------------|-----------------------------------------|
| RES1                      | Single family dwelling (e.g. House)                                    | 2                             | 2                                       |
| RES2                      | Mobile home                                                            | 1                             | 1                                       |
| RES3A                     | Duplex                                                                 | 3                             | 3+4                                     |
| RES3A                     | Duplex                                                                 | 4                             | 3+4                                     |
| RES3B                     | 3-4 units                                                              | 4                             | 4                                       |
| RES3C                     | 5-9 units                                                              | 5                             | 5                                       |
| RES3D                     | 10-19 units                                                            | 5                             | 5                                       |
| RES3E                     | 20-49 units                                                            | 5                             | 5                                       |
| RES3F                     | 50+ units                                                              | 5                             | 5                                       |
| RES4                      | Temporary lodging (e.g. Hotel/motel)                                   | 18                            | 18                                      |
| RES5                      | Institutional dormitory (e.g. Group housing (military, college), jail) | 13                            | 13                                      |
| RES6                      | Nursing home                                                           | 17                            | 17                                      |
| COM1                      | Retail trade (e.g. Store)                                              | 25                            | 25                                      |
| COM2                      | Wholesale trade (e.g. Warehouse)                                       | 5                             | 5+11                                    |
| COM2                      | Wholesale trade (e.g. Warehouse)                                       | 11                            | 5+11                                    |
| COM3                      | Personal and repair services (e.g. Service station/shop)               | 26                            | 26                                      |
| COM4                      | Professional/technical services (e.g. Offices)                         | 2                             | 2+4                                     |
| COM4                      | Professional/technical services (e.g. Offices)                         | 4                             | 2+4                                     |
| COM5                      | Banks                                                                  | 26                            | 26                                      |
| COM6                      | Hospital                                                               | 16                            | 16                                      |
| COM7                      | Medical office/clinique                                                | 8                             | 8                                       |
| COM8                      | Entertainment & recreation (e.g. Restaurants/bars)                     | 15                            | 15                                      |
| COM9                      | Theaters (e.g. Theaters)                                               | 13                            | 13                                      |
| COM10                     | Parking (e.g. Garages)                                                 | 1                             | 1                                       |
| IND1                      | Heavy (e.g. Factory)                                                   | 324                           | 324+333                                 |
| IND1                      | Heavy (e.g. Factory)                                                   | 333                           | 324+333                                 |
| IND2                      | Light (e.g. Factory)                                                   | 313                           | 313+314+315+316+321+322+323+326+327+337 |
| IND2                      | Light (e.g. Factory)                                                   | 314                           | 313+314+315+316+321+322+323+326+327+337 |
| IND2                      | Light (e.g. Factory)                                                   | 315                           | 313+314+315+316+321+322+323+326+327+337 |
| IND2                      | Light (e.g. Factory)                                                   | 316                           | 313+314+315+316+321+322+323+326+327+337 |
| IND2                      | Light (e.g. Factory)                                                   | 321                           | 313+314+315+316+321+322+323+326+327+337 |
| IND2                      | Light (e.g. Factory)                                                   | 322                           | 313+314+315+316+321+322+323+326+327+337 |
| IND2                      | Light (e.g. Factory)                                                   | 323                           | 313+314+315+316+321+322+323+326+327+337 |
| IND2                      | Light (e.g. Factory)                                                   | 326                           | 313+314+315+316+321+322+323+326+327+337 |
| IND2                      | Light (e.g. Factory)                                                   | 327                           | 313+314+315+316+321+322+323+326+327+337 |
| IND2                      | Light (e.g. Factory)                                                   | 337                           | 313+314+315+316+321+322+323+326+327+337 |
| IND3                      | Food/drugs/chemicals (e.g. Factory)                                    | 311                           | 311+312+325                             |
| IND3                      | Food/drugs/chemicals (e.g. Factory)                                    | 312                           | 311+312+325                             |
| IND3                      | Food/drugs/chemicals (e.g. Factory)                                    | 325                           | 311+312+325                             |
| IND4                      | Metal/minerals processing (e.g. Factory)                               | 331                           | 331+332                                 |

|      |                                                        |     |         |
|------|--------------------------------------------------------|-----|---------|
| IND4 | Metal/minerals processing (e.g. Factory)               | 332 | 331+332 |
| IND5 | High technology (e.g. Factory)                         | 334 | 334+335 |
| IND5 | High technology (e.g. Factory)                         | 335 | 334+335 |
| IND6 | Construction (e.g. Office)                             | 336 | 336     |
| REL1 | Church/non-profit                                      | 12  | 12      |
| GOV1 | General services (e.g. Office)                         | 2   | 2       |
| GOV2 | Emergency response (e.g. Police/fire station/eoc)      | 7   | 7       |
| EDU1 | Grade schools                                          | 14  | 14      |
| EDU2 | Colleges/universities (does not include group housing) | 14  | 14      |

**Table S3: Building type relationship between FEMA building types (see Table 4) and eQuest building types.**

| FEMA building code | FEMA building type                                                     | eQuest building code | eQUEST building type                     |
|--------------------|------------------------------------------------------------------------|----------------------|------------------------------------------|
| RES1               | Single family dwelling (e.g. House)                                    | 7                    | Multifamily_Low_rise_(exterior_Entries)  |
| RES2               | Mobile home                                                            | 7                    | Multifamily_Low_rise_(exterior_Entries)  |
| RES3A              | Duplex                                                                 | 7                    | Multifamily_Low_rise_(exterior_Entries)  |
| RES3A              | Duplex                                                                 | 7                    | Multifamily_Low_rise_(exterior_Entries)  |
| RES3B              | 3-4 units                                                              | 7                    | Multifamily_Low_rise_(exterior_Entries)  |
| RES3C              | 5-9 units                                                              | 7                    | Multifamily_Low_rise_(exterior_Entries)  |
| RES3D              | 10-19 units                                                            | 6                    | Multifamily_High_rise_(interior_Entries) |
| RES3E              | 20-49 units                                                            | 6                    | Multifamily_High_rise_(interior_Entries) |
| RES3F              | 50+ units                                                              | 6                    | Multifamily_High_rise_(interior_Entries) |
| RES4               | Temporary lodging (e.g. Hotel/motel)                                   | 5                    | Lodging_High-Rise_Hotel                  |
| RES5               | Institutional dormitory (e.g. Group housing (military, college), jail) | 1                    | Community_Center                         |
| RES6               | Nursing home                                                           | 3                    | Health_Long-term_Care_(Nursing_Home)     |
| COM1               | Retail trade (e.g. Store)                                              | 14                   | Retail_Stand-Alone_Structure             |
| COM2               | Wholesale trade (e.g. Warehouse)                                       | 17                   | Storage_Conditioned_(low_bay)            |
| COM2               | Wholesale trade (e.g. Warehouse)                                       | 17                   | Storage_Conditioned_(low_bay)            |
| COM3               | Personal and repair services (e.g. Service station/shop)               | 13                   | Retail_Service_Station-Convenience_Store |
| COM4               | Professional/technical services (e.g. Offices)                         | 8                    | Office_Bldg_2_story                      |
| COM4               | Professional/technical services (e.g. Offices)                         | 8                    | Office_Bldg_2_story                      |
| COM5               | Banks                                                                  | 13                   | Retail_Service_Station-Convenience_Store |
| COM6               | Hospital                                                               | 2                    | Health_Hospital_(inpatient)              |
| COM7               | Medical office/clinique                                                | 4                    | Health_Medical_clinic_(out_patient)      |
| COM8               | Entertainment & recreation (e.g. Restaurants/bars)                     | 10                   | Restaurant_Full_service_(full_menu)      |
| COM9               | Theaters (e.g. Theaters)                                               | 1                    | Community_Center                         |
| COM10              | Parking (e.g. Garages)                                                 | 18                   | Unknown_Custom_or_mixed_use              |
| REL1               | Church/non-profit                                                      | 9                    | Religious_Worship                        |
| GOV1               | General services (e.g. Office)                                         | 8                    | Office_Bldg_2_story                      |
| GOV2               | Emergency response (e.g. Police/fire station/eoc)                      | 8                    | Office_Bldg_2_story                      |
| EDU1               | Grade schools                                                          | 16                   | School_K-6_Elementary                    |
| EDU2               | Colleges/universities (does not include group housing)                 | 16                   | School_K-6_Elementary                    |

**Table S4: NEI to HPMS road class crosswalk**

| NEI 2011 Road Type                          | HPMS Road Class                                           |
|---------------------------------------------|-----------------------------------------------------------|
| Rural Interstate: Total                     | Rural Interstate                                          |
| Rural Other Principal Arterial: Total       | Rural Principal Arterial – Other Freeways and Expressways |
| Rural Other Principal Arterial: Total       | Rural Principal Arterial – Other                          |
| Rural Minor Arterial: Total                 | Rural Minor Arterial                                      |
| Rural Major Collector: Total                | Rural Major Collector                                     |
| Rural Minor Collector: Total                | Rural Minor Collector                                     |
| Rural Local: Total                          | Rural Local                                               |
| Urban Interstate: Total                     | Urban Interstate                                          |
| Urban Other Freeways And Expressways: Total | Urban Principal Arterial - Other Freeways and Expressways |
| Urban Other Principal Arterial: Total       | Urban Principal Arterial - Other                          |
| Urban Minor Arterial: Total                 | Urban Minor Arterial                                      |
| Urban Collector: Total                      | Urban Major Collector                                     |
| Urban Collector: Total                      | Urban Minor Collector                                     |
| Urban Local: Total                          | Urban Local                                               |

|                     |             |
|---------------------|-------------|
| Parking Area: Total | Urban Local |
|---------------------|-------------|

**Onroad AADT gap-filling**

Using the *Near Analysis* function in ArcGIS, road segments without AADT measurements are assigned the AADT value of the nearest road segment of the same road class with an AADT measurement. Road segments in need of gap-filling for which the nearest like-class is greater than 10 km away are gap-filled using the nearest road segment of the same class, without the urban/rural designation. All road classes, except for local roads, are gap-filled in this way. After all road segments in the road network (except local roads) are gap-filled for AADT data, total VMT are calculated for each road segment as

$$VMT = AADT * L \tag{S1}$$

where *AADT* is the traffic volume (vehicles/day) and *L* is the road segment length (miles/segment).

Figure S1/Table S5 show the amount of VMT and road length gap-filling required in each state by the 6 merged basemap road classes (other than the urban and rural local classes which get a “flat” spatial structure). Far less gap filling is needed for the larger road classes, especially the arterials. The largest amount of gap-filling occurs on rural collector roads, followed by urban collector roads.

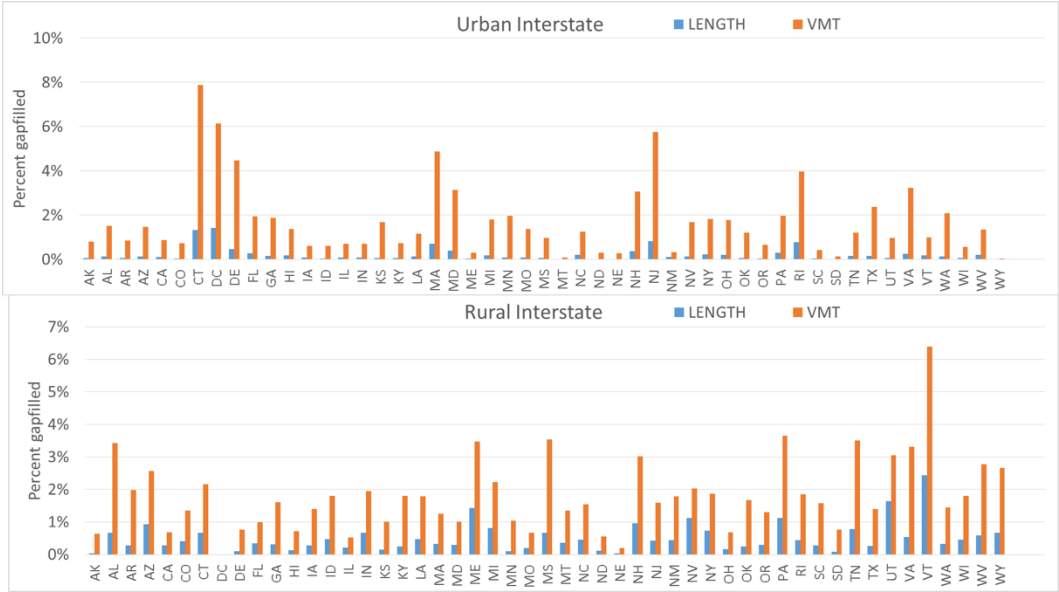

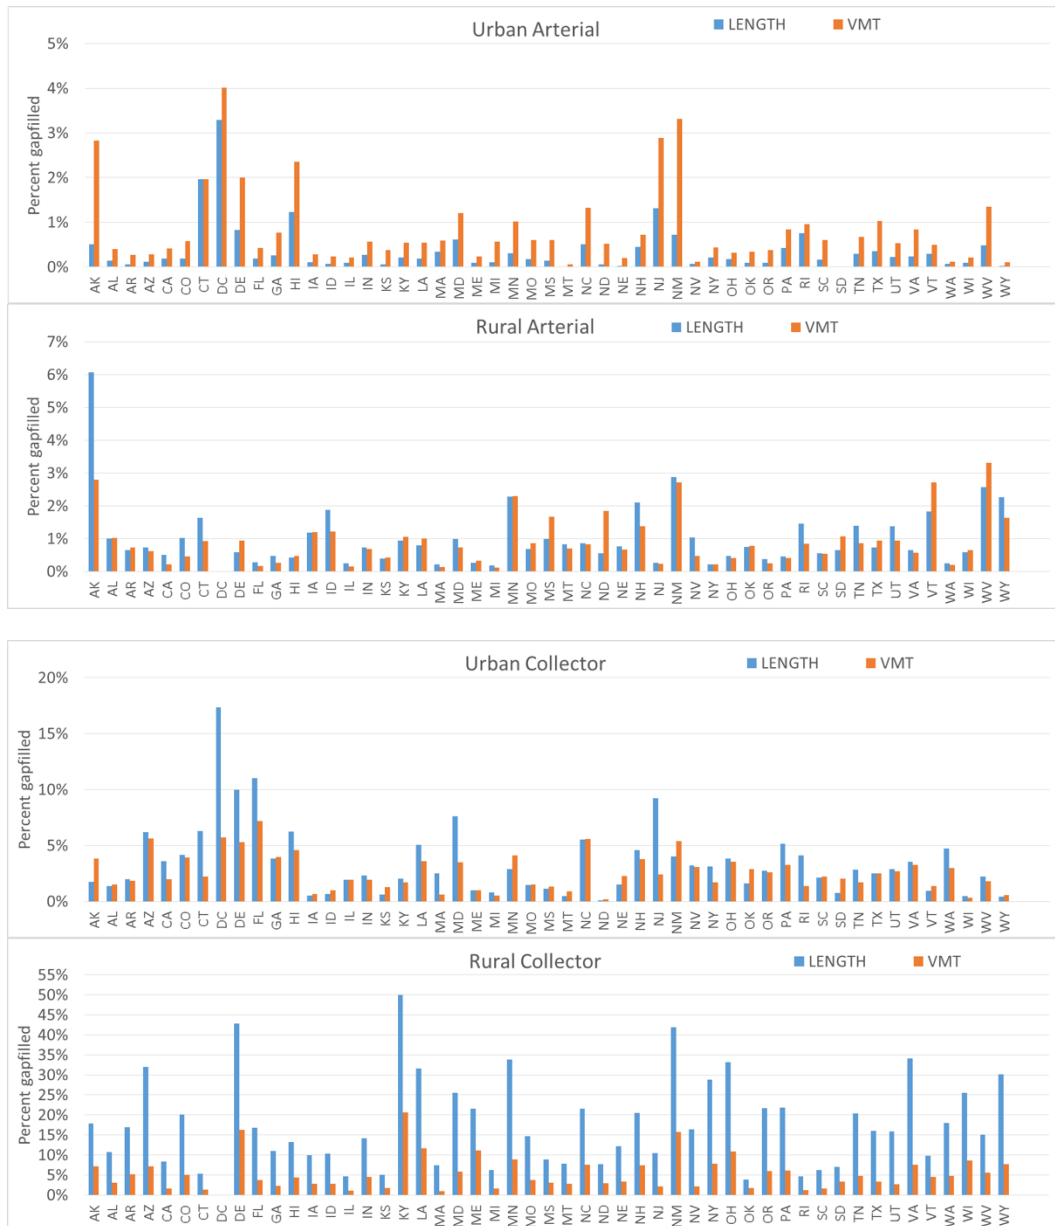

**Figure S1: The percent of the total VMT that was the result of gap-filling, organized by state and non-local road class.**

**Table S5: Statistics on vehicle miles traveled (VMT) and road length gap-filling categorized by non-local road class.**

|                  | VMT - percent gapfilled |      |        |      |       | Road length - percent gapfilled |       |        |      |       |
|------------------|-------------------------|------|--------|------|-------|---------------------------------|-------|--------|------|-------|
|                  | mean                    | sd   | median | min  | max   | mean                            | sd    | median | min  | max   |
| Rural Interstate | 2.2%                    | 1.3% | 2.0%   | 0.2% | 7.0%  | 0.6%                            | 0.5%  | 0.4%   | 0.0% | 2.5%  |
| Urban Interstate | 1.5%                    | 1.5% | 1.0%   | 0.0% | 7.2%  | 0.2%                            | 0.3%  | 0.1%   | 0.0% | 1.4%  |
| Rural Arterial   | 1.1%                    | 0.9% | 0.9%   | 0.2% | 3.8%  | 1.1%                            | 1.0%  | 0.8%   | 0.2% | 6.3%  |
| Urban Arterial   | 0.7%                    | 0.8% | 0.4%   | 0.0% | 4.0%  | 0.3%                            | 0.5%  | 0.1%   | 0.0% | 3.3%  |
| Rural Collector  | 6.5%                    | 4.9% | 5.3%   | 1.4% | 23.7% | 19.5%                           | 11.9% | 17.3%  | 4.1% | 52.3% |
| Urban Collector  | 2.2%                    | 1.4% | 1.8%   | 0.1% | 6.4%  | 2.7%                            | 2.9%  | 2.0%   | 0.1% | 17.3% |

## California/NEI vehicle/road class translation

The translation has two steps:

- 1) The FHWA VM2 data table contains the state-scale 2011 VMT on 14 road classes (FHWA 2011; 2013).<sup>1</sup> The FHWA VM4 data table contains the percentages of total VMT on 6 road classes across 6 vehicle classes.

The VMT specific to vehicle class and road class is estimated as follows:

$$VMT(s)_{v1}^{r1} = VMT(s)^{r1} \times p(s)_{v1}^{r2} \quad (S2)$$

where  $s$  denotes a statewide variable,  $r1$  is the 14-member road class,  $r2$  is the 6-member road class,  $v1$  is the 6-member vehicle class and  $p$  is the percentage of VMT.

Table S6 provides the crosswalk between the 14-member to the 6-member road class. With the state VMT for 6 vehicle classes on 14 road classes, one can generate a total for each vehicle class (across all rural and urban road classes).

**Table S6: Crosswalk between the 14-member (the “rural” versus “urban” delimiters are not contained in the file but are implicit) and 6-member FHWA road classes.**

| FHWA 14-member classes                         | FHWA 6-member classes |
|------------------------------------------------|-----------------------|
| Interstate (urban & rural)                     | interstate system     |
| other freeways and expressways (urban & rural) | other arterials       |
| other principal arterial (urban & rural)       | other arterials       |
| minor arterial (urban & rural)                 | other arterials       |
| major collector (urban & rural)                | other                 |
| minor collector (urban & rural)                | other                 |
| Local (urban & rural)                          | other                 |

- 2) The county-scale emissions by vehicle/road class is estimated as follows:

$$E(c)_{v1}^{r1} = \frac{VMT(s)_{v1}^{r1}}{\sum_{r1=1}^{14} VMT(s)_{v1}^{r1}} \times E(c)_{v2} \times 365 \times \frac{12.01}{44.01} \times 0.90718474 \quad (S3)$$

where  $c$  denotes a county variable, and  $v2$  is the 13-member vehicle class, final terms are conversion factors.

Table S7 provides the crosswalk between the 13-member vehicle class and the 6-member vehicle class.

**Table S7: Crosswalk between the 13-member EMFAC and 6-member FHWA vehicle classes**

| FHWA 6-member vehicle class | EMFAC 13-member vehicle class |
|-----------------------------|-------------------------------|
| Passenger cars              | LDA                           |
| Light Trucks                | LDT1                          |
| Light Trucks                | LDT2                          |
| Single-unit trucks          | LHDT1                         |
| Single-unit trucks          | LHDT2                         |
| Single-unit trucks          | MDV                           |
| Single-unit trucks          | MH                            |
| motorcycles                 | MCY                           |
| buses                       | OBUS                          |
| buses                       | SBUS                          |
| buses                       | UBUS                          |
| combination trucks          | MHDT                          |
| combination trucks          | HHDT                          |

<sup>1</sup> Data available from <https://www.fhwa.dot.gov/policyinformation/statistics/2011/vm2.cfm>; <https://www.fhwa.dot.gov/policyinformation/statistics/2013/vm4.cfm>

## Gap-filling onroad temporal data

The gap-filling availed of ten time profiles representing the twenty-four hour diurnal cycle for Monday, Friday, Saturday, Sunday, and Tues-Thurs in a six month summer (March - September) and a six month winter (September - March). Two seasons are used - Winter and Summer. Using four seasons resulted in an inability to gap fill some hours at some stations due to widespread missing data. Any hour for which traffic volume was not reported was gap-filled by matching the hour, season and day of the week to one of the ten average profiles and that average is used to fill the missing hour. When the number of values that go into generating the averages for the ten values falls below 6 (the max is 24), it is flagged with the number of members that were used. Figure S2 shows the number of instances where a single hour has less than or equal to 6 members for purposes of averaging. The maximum possible members in an average is 24 (6 months x 4 weeks). The total number of instances at each stations are 4380 (6 months x 4 weeks x 7 days x 24 hours) for a non-leap year. 2011 contained 888 individual hours across a total of 13 (an average of ~68/station) stations for which the averaging had less than 6 members. 2012 had 6768 such instances across 76 stations (about 89 per station) and 2013 had 1248 instances across 20 stations (an average of ~59 per station). Hence, there are numerous times where an average traffic volume value is constructed from a less than ideal number of averaging elements. 2012 appears to have the greatest number of instances in which averages are used that have less than 6 members to generate an average value.

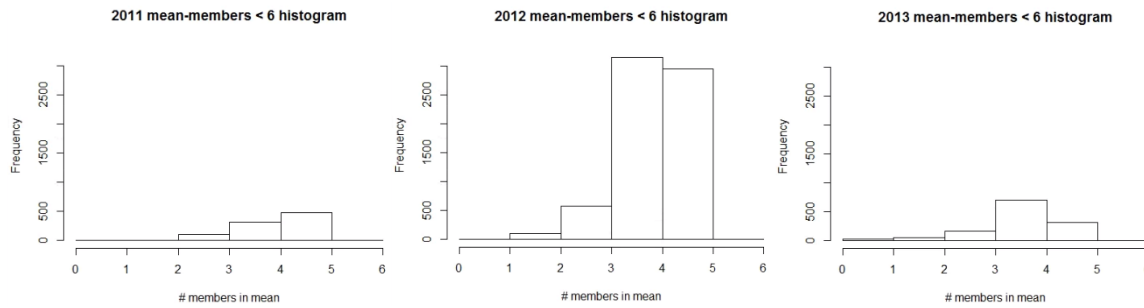

**Figure S2: Frequency of hourly averages consisting of less than 6 averaging members**

## Alternative railroad spatial distribution

The sum of these unmatched railroad emissions within a given county are distributed along all rail segments using freight tonnage statistics (RITA, 2012). These statistics represent the freight tonnage range on different railroad segments defined as a class. For example, “class 1” segments carry 0.1 to 4.9 megatonnes of freight per unit length of railroad surface. A mean value of 2.5 MGT was used and that allowed for a distributional procedure based on these mean tonnage statistics. This would be expressed as:

$$TC^k(s) = TC^k \times \frac{FT^k(s)}{\sum_{s=1}^S FT^k(s)} \quad (S4)$$

where the total carbon emissions,  $TC$ , on segment,  $s$ , for the sector,  $k$ , (railroad surface in this instance) is the total railroad carbon emissions at the county level multiplied by the ratio of the freight tonnage,  $FT$ , on segment (where

the original tonnage per unit length is multiplied by the railroad segment length),  $s$ , to the county integral of freight tonnage.

**Table S8. Relationship between the EIA SEDS sector/fuel codes and the sector/fuel categories used in the Vulcan multiyear scaling operation.**

| EIA/SEDS code | Vulcan sector/fuel           | notes                                               |
|---------------|------------------------------|-----------------------------------------------------|
| NGRCB         | Residential natural gas      | Used for residential natural gas                    |
| PARCB         | Residential petroleum        | Used for all petroleum fuels                        |
| CLRCB         | Residential coal             | Used for residential coal                           |
| NGCCB         | Commercial natural gas       | Used for commercial natural gas                     |
| PACCB         | Commercial petroleum         | Used for all petroleum fuels                        |
| CLCCB         | Commercial coal              | Used for commercial coal                            |
| NGICB         | Industrial natural gas       | Used for industrial natural gas                     |
| PAICB         | Industrial petroleum         | Used for all petroleum fuels                        |
| CLICB         | Industrial coal              | Used for industrial coal                            |
| NGEIB         | Electricity prod natural gas | Used for electricity production natural gas         |
| PAEIB         | Electricity prod petroleum   | Used for all petroleum fuels                        |
| CLEIB         | Electricity prod coal        | Used for electricity production coal                |
| NGACB         | Transportation natural gas   | Used for airport, onroad, nonroad                   |
| PAACB         | Transportation petroleum     | Used for onroad (other than gasoline), nonroad, CMV |
| CLACB         | Transportation coal          | Used for airport, onroad, nonroad, CMV – all coal   |
| JFACB         | Aviation jet fuel            | Used for airport all petroleum                      |
| MGACB         | Transportation gasoline      | Used for onroad gasoline                            |

**Table S9. Vulcan v3.0 state-scale FFCO<sub>2</sub> emissions for years 2010-2015. Units: Mt/year.**

| State/year | 2010   | 2011   | 2012   | 2013   | 2014   | 2015   |
|------------|--------|--------|--------|--------|--------|--------|
| AK         | 8.19   | 8.87   | 8.24   | 7.54   | 7.38   | 7.69   |
| AL         | 45.84  | 45.11  | 43.31  | 42.78  | 44.02  | 42.70  |
| AR         | 18.21  | 18.64  | 18.77  | 19.14  | 19.14  | 16.56  |
| AZ         | 30.01  | 29.49  | 29.29  | 30.39  | 29.83  | 29.76  |
| CA         | 105.93 | 104.00 | 104.27 | 105.61 | 103.68 | 104.59 |
| CO         | 33.34  | 31.01  | 30.92  | 31.74  | 32.24  | 31.89  |
| CT         | 10.46  | 10.00  | 9.69   | 10.14  | 10.24  | 10.61  |
| DC         | 1.31   | 1.24   | 1.09   | 1.14   | 1.24   | 1.23   |
| DE         | 3.68   | 4.01   | 4.20   | 4.38   | 4.59   | 4.45   |
| FL         | 82.88  | 77.43  | 75.15  | 75.24  | 77.13  | 78.29  |
| GA         | 51.72  | 47.70  | 42.43  | 42.06  | 43.34  | 42.23  |
| HI         | 5.24   | 5.40   | 5.16   | 5.12   | 4.97   | 4.94   |
| IA         | 25.23  | 24.41  | 23.00  | 23.22  | 23.47  | 21.84  |
| ID         | 5.74   | 5.66   | 5.69   | 6.19   | 6.05   | 6.69   |
| IL         | 71.57  | 70.42  | 66.60  | 70.47  | 71.45  | 67.34  |
| IN         | 60.98  | 59.16  | 55.89  | 58.32  | 59.65  | 55.89  |
| KS         | 22.19  | 21.46  | 20.28  | 21.57  | 21.88  | 19.78  |
| KY         | 40.19  | 39.62  | 37.25  | 37.26  | 37.42  | 35.15  |
| LA         | 50.44  | 51.96  | 48.64  | 47.77  | 46.80  | 47.29  |
| MA         | 22.73  | 21.68  | 19.61  | 20.38  | 20.16  | 20.68  |
| MD         | 25.97  | 20.97  | 19.95  | 19.27  | 19.86  | 19.45  |
| ME         | 5.94   | 5.76   | 5.27   | 5.42   | 5.37   | 5.36   |
| MI         | 49.80  | 47.99  | 46.82  | 49.40  | 49.98  | 49.80  |
| MN         | 34.41  | 33.96  | 32.74  | 34.01  | 35.00  | 33.04  |
| MO         | 40.56  | 40.84  | 38.76  | 39.93  | 39.64  | 37.47  |
| MS         | 18.82  | 17.22  | 17.56  | 17.27  | 17.97  | 18.31  |
| MT         | 9.63   | 8.90   | 8.49   | 8.91   | 8.98   | 8.95   |
| NC         | 47.26  | 42.62  | 41.34  | 44.18  | 44.82  | 42.29  |
| ND         | 12.27  | 12.60  | 13.72  | 13.30  | 13.64  | 13.21  |
| NE         | 14.41  | 14.66  | 14.16  | 14.84  | 14.51  | 14.01  |
| NH         | 4.76   | 4.70   | 4.28   | 4.19   | 4.30   | 4.36   |
| NJ         | 26.72  | 26.08  | 24.43  | 24.92  | 26.03  | 26.11  |
| NM         | 15.27  | 15.68  | 15.29  | 15.24  | 14.25  | 14.62  |



|    |        |        |        |        |        |        |
|----|--------|--------|--------|--------|--------|--------|
| NV | 15.08  | 13.17  | 13.13  | 13.72  | 14.69  | 12.77  |
| NY | 55.77  | 51.98  | 51.25  | 52.02  | 54.28  | 53.22  |
| OH | 78.19  | 75.07  | 70.23  | 72.57  | 73.45  | 68.69  |
| OK | 31.96  | 32.31  | 31.77  | 31.10  | 31.51  | 30.47  |
| OR | 11.98  | 10.86  | 10.88  | 11.62  | 11.30  | 11.37  |
| PA | 78.33  | 74.85  | 71.63  | 74.53  | 74.17  | 70.96  |
| RI | 5.28   | 4.83   | 4.60   | 4.81   | 5.25   | 5.10   |
| SC | 24.74  | 23.62  | 22.22  | 21.11  | 22.33  | 22.08  |
| SD | 3.90   | 3.70   | 3.84   | 3.86   | 3.94   | 3.60   |
| TN | 32.05  | 31.06  | 29.68  | 29.40  | 30.70  | 28.88  |
| TX | 146.50 | 150.20 | 144.56 | 149.70 | 151.94 | 150.98 |
| UT | 20.44  | 20.63  | 20.17  | 21.59  | 21.38  | 20.80  |
| VA | 29.81  | 27.35  | 26.78  | 28.69  | 28.40  | 28.26  |
| VT | 1.80   | 1.76   | 1.68   | 1.76   | 1.78   | 1.84   |
| WA | 20.69  | 19.23  | 19.27  | 20.76  | 20.02  | 20.85  |
| WI | 32.93  | 32.03  | 29.42  | 32.26  | 32.49  | 31.99  |
| WV | 25.18  | 25.02  | 23.32  | 23.86  | 25.37  | 23.25  |
| WY | 21.89  | 22.30  | 22.72  | 23.21  | 22.54  | 21.97  |

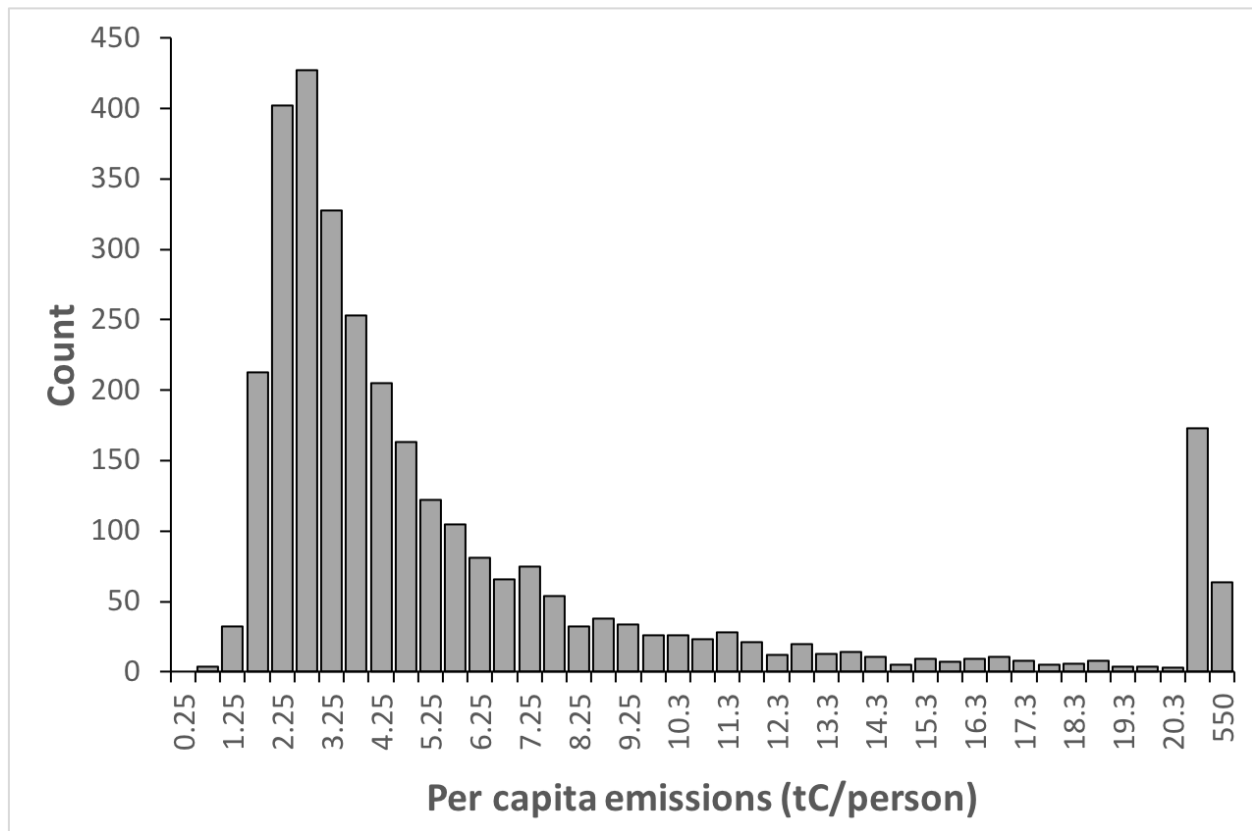

Figure S3: Frequency distribution of the state-scale per capita total FFCO<sub>2</sub> emissions.
